# Supplementary material
Source: PubMed Central journal article supplement (PMC6158067)
Supplement: NIHMS1500493-supplement-1.pdf [file NIHMS1500493-supplement-1.pdf]

**Sphingolipid biosynthesis induces a conformational change in the murine norovirus receptor and facilitates viral infection**

**Authors:** Robert C. Orchard<sup>1,2\*</sup>, Craig B. Wilen<sup>1</sup>, and Herbert W. Virgin<sup>1\*</sup>

**Affiliations:**

<sup>1</sup>Department of Pathology and Immunology, Washington University School of Medicine, St. Louis, MO 63110

<sup>2</sup>Current address: Department of Immunology, University of Texas Southwestern Medical Center, Dallas, TX 75390

Corresponding Authors e-mail: [Robert.Orchard@UTSouthwestern.edu](mailto:Robert.Orchard@UTSouthwestern.edu) (R.C.O);  
[Virgin@wustl.edu](mailto:Virgin@wustl.edu) (H.W.V.)

**Supplemental Information**

**Supplemental Figure 1: Design of BV2Δ*Sptlc2* clone**

**Supplemental Figure 2: Scans of uncropped blots**

Supplemental Figure 1

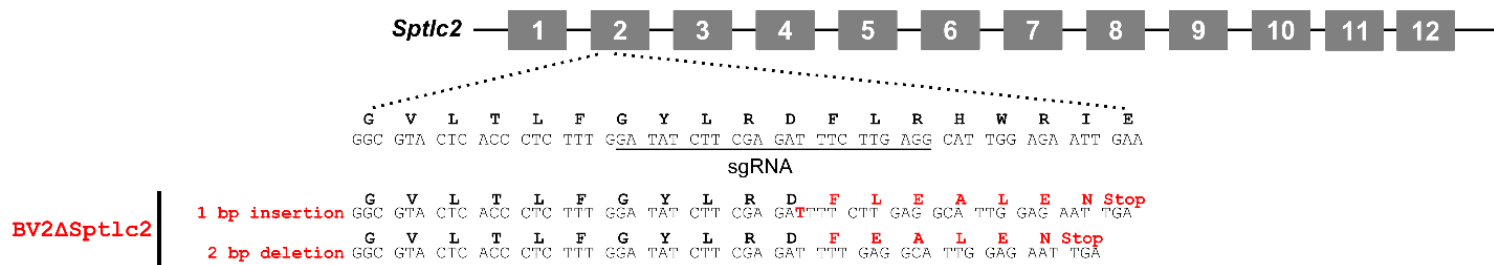

Supplemental Figure 1: Design of BV2ΔSpt1c2 clone

**Supplemental Figure 2**

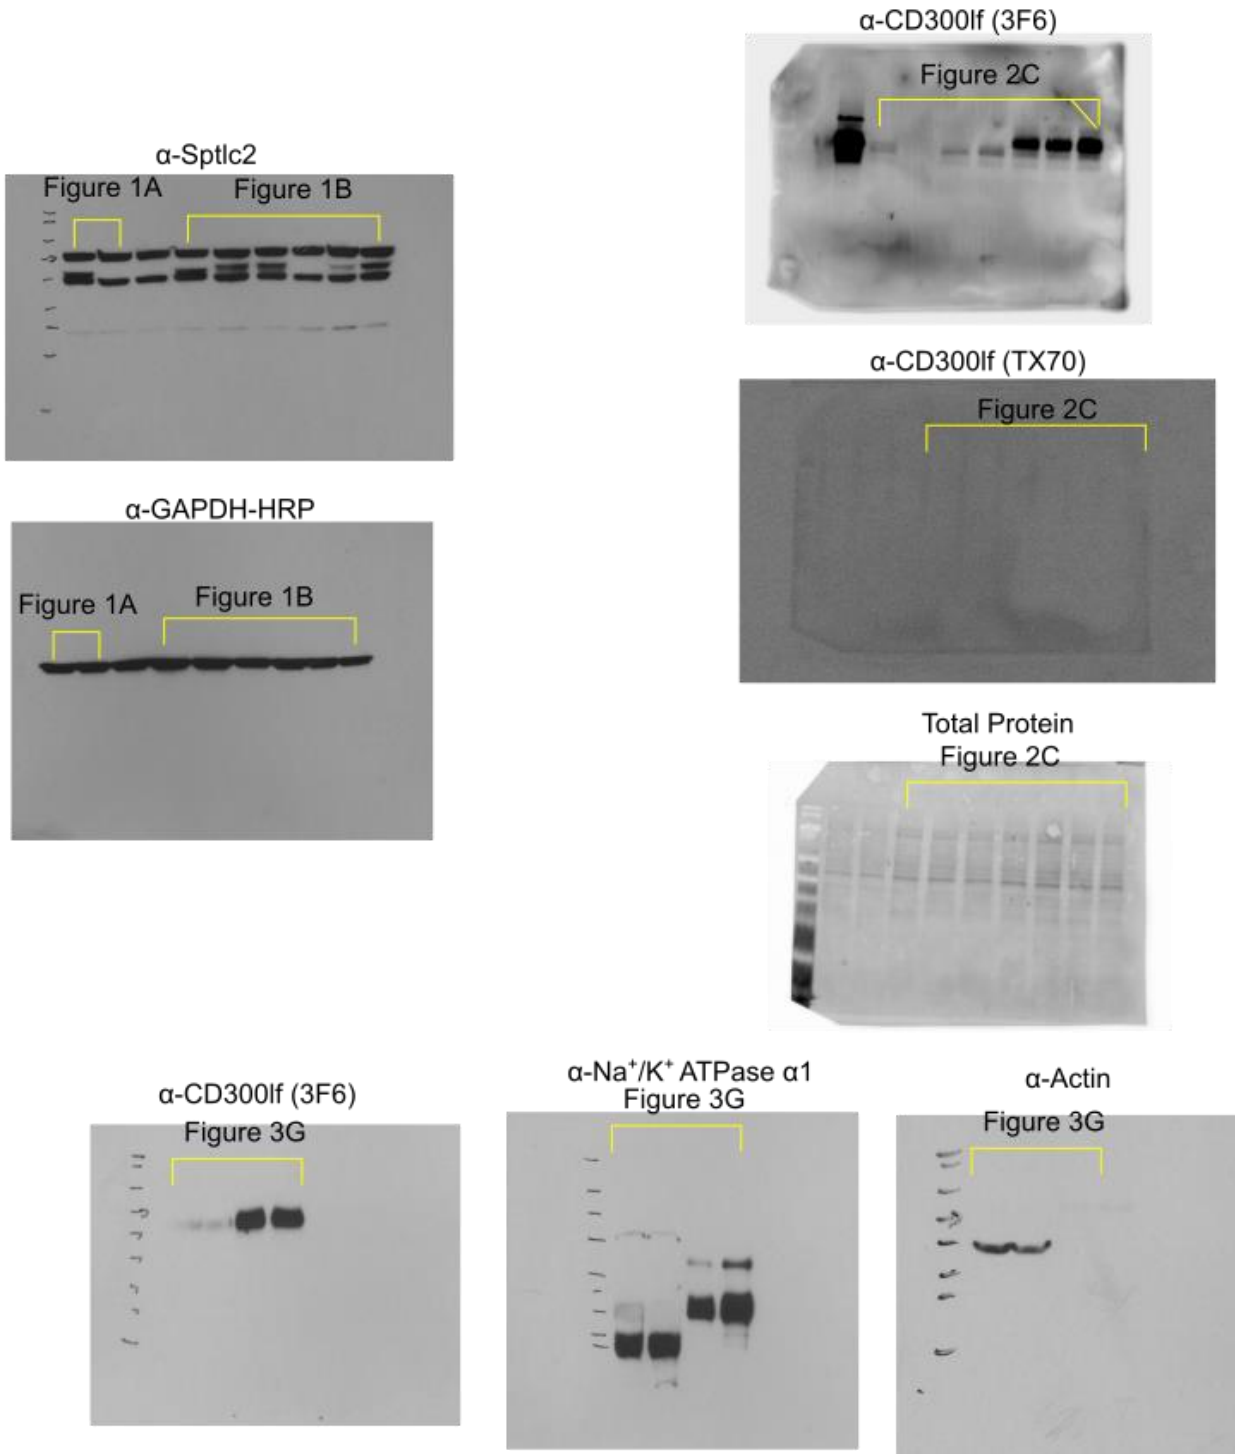

**Supplemental Figure 2: Scans of uncropped blots**
